# Supplementary material
Source: ML conference proceedings conference paper supplement (https://openreview.net/forum?id=vFanHFE4Qv)
Supplement: supplementary_material [file attachment]

## Sheet: Feuil1
Variable name	Size	Content	Unit
frame.states.npy	nFrames * 1	Cortical State for each frame (0,1,2)	integer
frame.neuralActivity.npy	nFrames*nNeurons	Deconvolved calcium trace for each neuron/frame	AU
frame.times.npy	nFrames * 1	Time (s) of imaging frames	seconds
plane.offset_times.npy	nPlanes*1	Time offset between each plane and frame.times	seconds
states.names.txt	nStates*1	Cortical state names (Running, Stat Desynch., Stat Synch)	text
neuron.ttype.npy	nNeurons*1	Assigned Subtype of each neuron	text (Tasic et al 2018 Subtypes)
neuron.gene_count.npy	nNeurons*nGenes	Gene count for each neuron (matched only; all others NaN)	gene counts
neuron.prob_ttypes.npy	nNeurons * nSubtypes	Subtype probability assignment for each neuron and each Subtype (matched only; all others NaN)	probability
neuron.depth.npy	nNeurons * 1	Cortical depth of each neuron	microns
neuron.stackPos.npy	nNeurons * 2	XY position of each neuron ( within a unique referential for each animal)	microns	WRONG alignment between sessions
neuron.stackPosCorrected.npy	nNeurons * 2	XY position of each neuron ( within a unique referential for each animal)	microns	CORRECT alignment between sessions
neuron.rfCenter_Xvis.npy	nNeurons * 1	Center (horizontal position) of each neuron's receptive field	pixels
neuron.rfCenter_Yvis.npy	nNeurons * 1	Center (vertical position) of each neuron's receptive field	pixels
neuron.rfMap.npy	nNeurons * nXdegrees * nYdegrees	Each neuron's receptive field, from sparse noise stimuli. (Use Screen range to convert X and Y to visual degrees)	AU
neuron.plane.npy	nNeurons * 1	Imaging plane ID for each neuron in a given session	integer	counting from 0
neuron.UniqueID.npy	nNeurons * 1	Cell ID for each unique neuron (some neurons were recorded in more than one session;matched only; all others NaN)	integer	counting from 0
screen.elevation.npy	2*1	Screen range in elevation	degrees visual angle
screen.azimuth.npy	2*1	Screen range in azimuth	degrees visual angle
genes.names.txt	nGenes*1	Name of each gene (index for neuron.gene_count)	text (HGNC gene naming)
ttypes.names.txt	nSubtypes*1	Name of each Subtype (index for neuron.prob_ttypes)	text (Tasic et al 2018) t-types
ori.intervals.npy	nOriStim*2	2 column array with onset and offset times of Drifting grating presentations in seconds	seconds
ori.stimSize.npy	nOriStim*1	Stimulus size for each Drifting grating presentation	degrees visual angle
ori.stimDirection.npy	nOriStim*1	Stimulus direction for each Drifting grating presentation	degrees
ori.stimPosition_Xvis.npy	nOriStim*1	Stimulus horizontal position for each Drifting grating presentation	degrees visual angle
ori.stimPosition_Yvis.npy	nOriStim*1	Stimulus vertical position for each Drifting grating presentation	degrees visual angle
ori.contrast.npy	nOriStim*1	Stimulus contrast for each Drifting grating presentation	% contrast
nat.stimOn_times.npy	nNatStim*2	2 column array with onset and offset times of Natural Scene presentations in seconds	seconds
nat.img.npy	nNatStim*1	ID of image shown (NaN if blank)	integer	counting from 0
nat.blank.npy	nNatStim*1	is blank? (1 if blank, 0 otherwise)	integer
img.picture.npy	nImages*nX*nY	Bitmap for Image shown	uint8
running.speed.npy	nRunSample * 1	Raw Running speed	cm/s
running.times.npy	nRunSample * 1	Time (s) of ball measures	s
eye.size.npy	nEyeSample * 1	Pupil Area	pixels2
eye.xPos.npy	nEyeSample * 1	Horizontal position of Pupil	pixels
eye.yPos.npy	nEyeSample * 1	Vertical position of Pupil	pixels
eye.times.npy	nEyeSample * 1	Time (s) of eye video frames	s
Db.mouse_names.txt	nSession * 1	Mouse name	text
Db.session_names.txt	nSession * 1	Session name	text
